# Supplementary material for: Prevalence of Long COVID symptoms in Bangladesh: a prospective Inception Cohort Study of COVID-19 survivors
Source: PubMed Central journal article supplement — BMJ Glob Health. 2021 Dec 14;6(12):e006838. doi: 10.1136/bmjgh-2021-006838 (PMC8671853; doi:10.1136/bmjgh-2021-006838), 2021-12-14
Supplement: bmjgh-2021-006838supp001.pdf [file bmjgh-2021-006838supp001.pdf]

গণপ্রজাতন্ত্রী বাংলাদেশ সরকার  
পরিকল্পনা ও গবেষণা  
স্বাস্থ্য অধিদপ্তর  
মহাখালী, ঢাকা-১২১২  
[www.dghs.gov.bd](http://www.dghs.gov.bd)

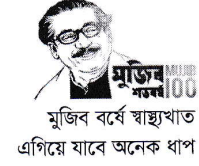

স্মারক নং- স্বাঃ অধিঃ/পঃ ও গবেঃ/ গবেষণার প্রশাসনিক অনুমোদন / ৪৫৮/২০২০/ ৬২৬ তারিখঃ ২৭/০৬/২০২১ ইং

বিষয়ঃ মহাপরিচালক, স্বাস্থ্য অধিদপ্তর বরাবর প্রেরিত, পি এইচ ডি গবেষণার জন্য Covid-19 এ আক্রান্ত রোগীদের নাম ও যোগাযোগ নম্বরের তালিকার জন্য অনুমতি প্রদান বিষয়ক পত্রটি প্রসঙ্গে।

সূত্রঃ পত্রের স্মারক নং-CRP/PT/2102/38, তারিখ-১১/১০/২০ ঞিঃ

উপর্যুক্ত বিষয় ও সূত্রের প্রেক্ষিতে জানানো যাচ্ছে যে, মুহাম্মদ আনোয়ার হোসেন, সিনিয়র কনসালটেন্ট ও বিভাগীয় প্রধান, ফিজিওথেরাপি বিভাগ, সহযোগী অধ্যাপক, বিএইচপিআই, সিআরপি- কে গবেষণার শর্ত সমূহ মেনে চলার সাপেক্ষে Symptom presentations among the covid-19 survivors in Bangladesh এই গবেষণার জন্য Covid-19 এ আক্রান্ত রোগীদের নাম ও যোগাযোগ নম্বরের তালিকা প্রদান করার জন্য সংশ্লিষ্ট এলাকার সিভিল সার্জনকে নির্দেশক্রমে অনুরোধ করা হল।

গবেষণার উল্লেখযোগ্য শর্ত সমূহঃ

- ০১। গবেষণার অগ্রগতি নিয়মিত স্বাস্থ্য অধিদপ্তরকে অবহিত করতে হবে।
- ০২। গবেষণার ফলাফল প্রকাশের পূর্বে স্বাস্থ্য অধিদপ্তর এর অনুমোদন গ্রহণ করতে হবে।
- ০৩। প্রাপ্ত ডাটা শুধু মাত্র গবেষণার কাজে ব্যবহার করবে ও Covid-19 এ আক্রান্ত রোগীদের তথ্যের গোপনীয়তা বজায় রাখবে।
- ০৪। এ গবেষণায় বাংলাদেশ সরকারের কোন অর্থের প্রয়োজন হবে না।
- ০৫। জনস্বার্থে স্বাস্থ্য অধিদপ্তর গবেষণার যে কোন পর্যায়ে প্রশাসনিক অনুমোদন বাতিল করতে পারবে।

এ বিষয়ে মহাপরিচালক মহোদয়ের সদয়সম্মতি রয়েছে।

*Alhmd*  
27/6/2021

(ডাঃ আফরিনা মাহমুদ)  
পরিচালক

পরিকল্পনা ও গবেষণা  
স্বাস্থ্য অধিদপ্তর মহাখালী, ঢাকা-১২১২  
ফোন- ০২-৯৮৮০০৮২  
ই-মেইল-rd@ld.dghs.gov.bd

অনুলিপি সদয় অবগতির জন্য প্রেরণ করা হলো (জ্যেষ্ঠতার ক্রমানুসারে নয়)

- ১। সচিব, স্বাস্থ্য সেবা বিভাগ, স্বাস্থ্য ও পরিবার কল্যাণ মন্ত্রণালয়, বাংলাদেশ সচিবালয়, ঢাকা।  
(দৃঃ আঃ সচিব মহোদয়ের একান্ত সচিব)
- ২। মহাপরিচালক, স্বাস্থ্য অধিদপ্তর, মহাখালী, ঢাকা (দৃঃ আঃ সহকারী পরিচালক সমন্বয়)।
- ৩। অতিরিক্ত মহাপরিচালক (প্রশাসন), স্বাস্থ্য অধিদপ্তর, মহাখালী, ঢাকা।
- ৪। অতিরিক্ত মহাপরিচালক (পরিকল্পনা ও উন্নয়ন), স্বাস্থ্য অধিদপ্তর, মহাখালী, ঢাকা।
- ৫। সিভিল সার্জন -----।
- ৬। মুহাম্মদ আনোয়ার হোসেন, সিনিয়র কনসালটেন্ট ও বিভাগীয় প্রধান, ফিজিওথেরাপি বিভাগ, সহযোগী অধ্যাপক, বিএইচপিআই, সিআরপি।
- ৭। অফিস কপি।
